# Supplementary material for: CD14 Modulates Inflammation-Driven Insulin Resistance
Source: PubMed Central journal article supplement — Diabetes. 2011 Jul 18;60(8):2179–86. doi: 10.2337/db10-1210 (PMC3142089; doi:10.2337/db10-1210), 2011-07-18
Supplement: supp_db10-1210_DB101210SupplementaryData.pdf [file supp_db10-1210_DB101210SupplementaryData.pdf]

SUPPLEMENTARY DATA

**Supplementary Table 1:** List of genes up and down regulated in adipose tissue of mice after sCD14 treatment.

| probe_id    | gene_id | symbol  | FoldChange<br>(absolut) | logFC  | t      | P Value   |
|-------------|---------|---------|-------------------------|--------|--------|-----------|
| 1419127_at  | 109648  | Npy     | 3.638                   | -1.863 | -3.253 | 0.0034238 |
| 1422153_a_a | 68854   | Asb11   | 3.406                   | -1.768 | -3.832 | 0.0008217 |
| 1450346_at  | 14765   | Gpr50   | 3.125                   | 1.644  | 2.970  | 0.0067392 |
| 1452124_at  | 11735   | Ank3    | 2.989                   | -1.580 | -3.296 | 0.0030819 |
| 1457435_x_a | 17930   | Myom2   | 2.741                   | -1.455 | -3.120 | 0.0047147 |
| 1434909_at  | 52187   | Rragd   | 2.603                   | -1.380 | -5.295 | 0.0000207 |
| 1439036_a_a | 11931   | Atp1b1  | 2.563                   | -1.358 | -3.006 | 0.0061923 |
| 1454752_at  | 666794  | Rbm24   | 2.548                   | -1.350 | -4.275 | 0.0002705 |
| 1449398_at  | 66211   | Rpl3l   | 2.541                   | -1.346 | -4.621 | 0.0001129 |
| 1418095_at  | 66106   | Smpx    | 2.414                   | -1.271 | -3.200 | 0.0038902 |
| 1418373_at  | 56012   | Pgam2   | 2.310                   | -1.208 | -2.911 | 0.0077279 |
| 1426615_s_a | 234593  | Ndr4    | 2.279                   | -1.189 | -2.953 | 0.0070028 |
| 1448182_a_a | 12484   | Cd24a   | 2.269                   | -1.182 | -2.857 | 0.0087778 |
| 1450826_a_a | 20210   | Saa3    | 2.262                   | 1.177  | 2.971  | 0.0067260 |
| 1422644_at  | 50795   | Sh3bgr  | 2.189                   | -1.130 | -4.200 | 0.0003265 |
| 1451152_a_a | 11931   | Atp1b1  | 2.185                   | -1.128 | -2.997 | 0.0063207 |
| 1438175_x_a | 17930   | Myom2   | 2.180                   | -1.125 | -4.188 | 0.0003369 |
| 1423890_x_a | 11931   | Atp1b1  | 2.142                   | -1.099 | -3.031 | 0.0058273 |
| 1424616_s_a | 233575  | Pgap2   | 2.115                   | -1.081 | -2.903 | 0.0078806 |
| 1450917_at  | 17930   | Myom2   | 2.095                   | -1.067 | -2.989 | 0.0064458 |
| 1417889_at  | 11811   | Apobec2 | 2.082                   | -1.058 | -2.983 | 0.0065285 |
| 1418589_a_a | 17349   | Mif1    | 2.078                   | -1.055 | -3.394 | 0.0024302 |
| 1460318_at  | 13009   | Csrp3   | 2.058                   | -1.041 | -2.847 | 0.0089935 |
| 1417951_at  | 13808   | Eno3    | 2.053                   | -1.038 | -2.993 | 0.0063831 |
| 1418453_a_a | 11931   | Atp1b1  | 2.053                   | -1.038 | -3.073 | 0.0052715 |
| 1438399_at  | 58869   | Pex5l   | 2.040                   | 1.028  | 3.173  | 0.0041560 |
| 1457275_at  | 233335  | Synm    | 2.002                   | -1.002 | -3.889 | 0.0007133 |
| 1417715_a_a | 14719   | Got2    | 1.995                   | -0.996 | -3.023 | 0.0059438 |
| 1419762_at  | 24108   | Ubd     | 1.979                   | 0.984  | 2.859  | 0.0087444 |
| 1419606_a_a | 21955   | Tnnt1   | 1.967                   | -0.976 | -3.948 | 0.0006160 |
| 1417634_at  | 20657   | Sod3    | 1.965                   | 0.975  | 3.817  | 0.0008545 |
| 1451721_a_a | 14961   | H2-Ab1  | 1.941                   | 0.957  | 3.681  | 0.0011979 |
| 1449308_at  | 12274   | C6      | 1.928                   | 0.947  | 3.228  | 0.0036375 |
| 1449178_at  | 53318   | Pdlim3  | 1.912                   | -0.935 | -3.873 | 0.0007427 |
| 1456180_at  | 666794  | Rbm24   | 1.906                   | -0.930 | -3.497 | 0.0018899 |
| 1418849_x_a | 11832   | Aqp7    | 1.880                   | 0.911  | 3.059  | 0.0054578 |
| 1425341_at  | 16527   | Kcnk3   | 1.853                   | 0.890  | 3.461  | 0.0020618 |
| 1453355_at  | 75607   | Wnk2    | 1.810                   | -0.856 | -3.175 | 0.0041344 |
| 1417633_at  | 20657   | Sod3    | 1.777                   | 0.830  | 3.732  | 0.0010543 |
| 1459860_x_a | 80890   | Trim2   | 1.763                   | -0.818 | -3.152 | 0.0043715 |
| 1447657_s_a | 68760   | Synpo2l | 1.755                   | -0.811 | -3.072 | 0.0052825 |

SUPPLEMENTARY DATA

**Supplementary Figure 1. A.** Effect of high fat diet (HFD) on oral glucose tolerance test in mice after one month (triangles) or 3 months (crosses) versus mice fed a normal chow (NC, squares). Glucose tolerance impairs over time during HFD. **B.** Effect of one month HFD on glucose tolerance test in mice grafted with BM from WT mice (triangles) vs. mice which were not grafted (not irradiated, squares). The irradiation and grafting procedure has impaired the diabetogenic effect of the HFD. **C.** Effect of a 3 month HFD on oral glucose tolerance in mice which were grafted with BM from WT donor (triangles) or not grafted (not irradiated, squares). As for figure B, the impact of HFD on glucose tolerance is reduced. **D.** Impact of a one month HFD (squares) vs. NC (diamonds) on oral glucose tolerance. The data shows that the diabetogenic impact is lower in the grafted mice than in the non grafted mice (Figure A). It requires a longer period of time. The interpretation is that the irradiation has hampered the role of some cells in the development of glucose intolerance.

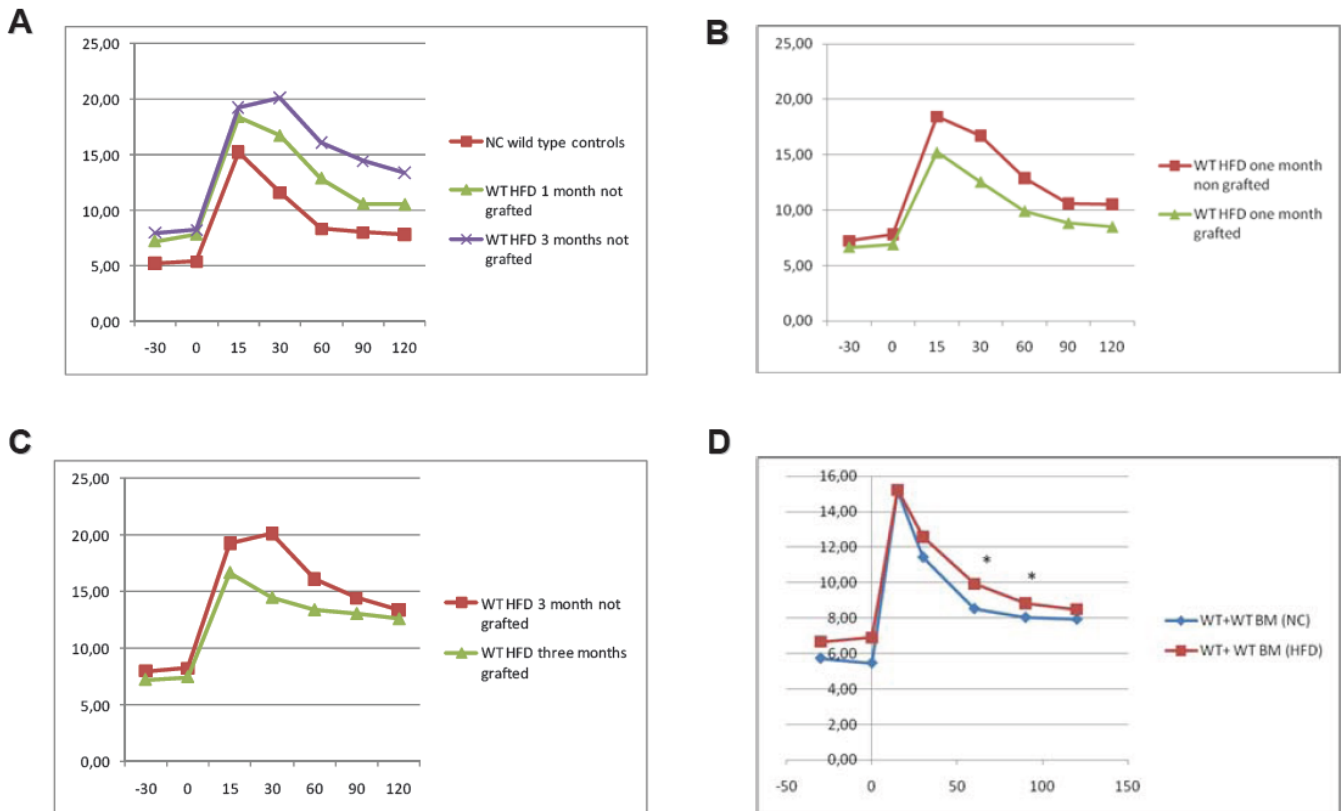

SUPPLEMENTARY DATA

**Supplementary Figure 2. A.** Circulating sCD14 levels in the different models studied. **B.** Glucose intolerance following and oral glucose glucose challenge is significantly impaired (2 way ANOVA, Bonferoni Post hoc test,  $p < 0.05$ ) in wildtype mice grafted with bone marrow from the WT donor and fed a HFD when compared to the same group of mice but fed a NC. Conversely, in WT mice grafted with CD14 KO BM donor glucose intolerance was not observed. Similarly, CD14 receiver mice never became glucose intolerant in response to HFD. This suggests that both the hematopoietic cells and the cells from the body require CD14 to become glucose intolerant in response to a HFD. **C.** Fasting triglycerides and free fatty acids in the different models (\*  $p < 0.05$ ).

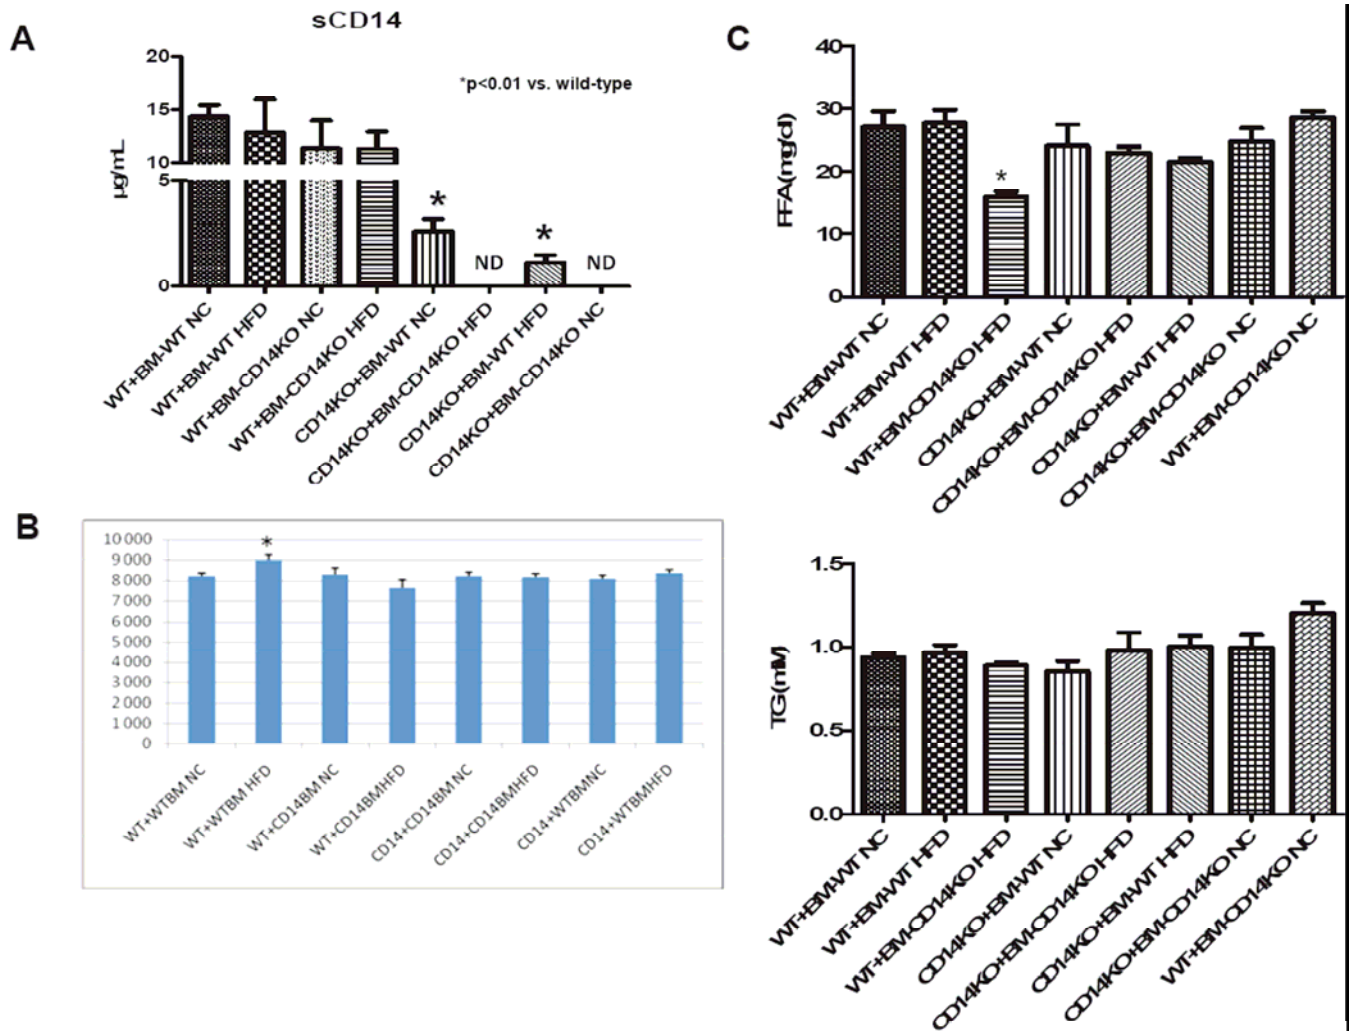

## SUPPLEMENTARY DATA

**Supplementary Figure 3.** Confirmation by real-time PCR of the effect of CD14 treatment on gene expression in epididimal adipose tissue from control and CD14 treated *ob/ob* mice. Gene expression of defense response (A) lipid related (B) and proinflammatory (C) proteins in control (C, white bars) and CD14 treated *ob/ob* mice (CD14, black bars) are shown. Results are expressed as mean  $\pm$  SEM relative to the control value set as 1.0 (n=6). Statistical analyses comparing gene expression in control vs. CD14 treated *ob/ob* mice were performed by paired t test. Saa3, p=0.017; LBP, p=0.023; Cd74, p=0.018; Apoc1, p=0.027; Apoc2, p=0.0046; IL-1-alpha, p=0.01; IL-1-beta, p=0.05.

RNA from epididimal adipose tissue was extracted using a kit (RNeasy; Qiagen, Valencia, CA, USA). RNA (2  $\mu$ g) was reverse-transcribed to cDNA using SuperscriptII enzyme (Invitrogen, USA). Real-time PCR was used to measure specific mRNAs (ABI-PRISM 7700 Sequence Detector; Perkin-Elmer Applied Biosystems, Foster City, CA, USA). All reactions were performed in 384-well optical plates (MicroAmp; Applied Biosystems, Foster City, CA, USA). Amplification mixes (10  $\mu$ l) contained the diluted cDNA sample, 2X TaqMan Universal PCR Mastermix (Applied Biosystems) or Sybr green PCR Mastermix (Applied Biosystems), forward and reverse primers, and probe for the specific mRNAs. Glyceraldehyde 3-phosphate dehydrogenase (GAPDH) was used as endogenous control. Thermal cycling conditions included 10 min at 203,00°F before the onset of the PCR cycles, which consisted of 40 cycles at 95°C for 15 s and 65°C for 1 min. The oligonucleotide sequences for the primer pairs used for *GAPDH* was 5'-catggcctccgtgttecta -3' and 5'-gcggcagtcagatcca -3'. The primers and probes for Saa3, Cd74, Cd24a, LBP, Apoc1, Apoc2, IL-1 alpha, IL-1 beta, IL-6 and TNF-alpha were supplied as a kit (TaqMan Reagents Mm00441203\_m1, Mm00658576\_m1, Mm00782538\_sH, LBP, Mm00431816\_m1, Mm00431816\_m1, Mm00439620\_m1 and Mm01336189\_m1, Applied Biosystems) and used according to the manufacturer's instructions. The primers for IL-6 were: 5'-GCCACCAAGAACGATAGTCA-3' and 5'-CAAGAAGGCAACTGGATGGAA-3'; and for TNFalpha: 5'-CACAAGATGCTGGGACAGTGA-3' and 5'-TCCTTGATGGTGGTGCATGA-3'. mRNA expression was calculated using the  $\Delta C_t$  method.

SUPPLEMENTARY DATA

A

Defense response

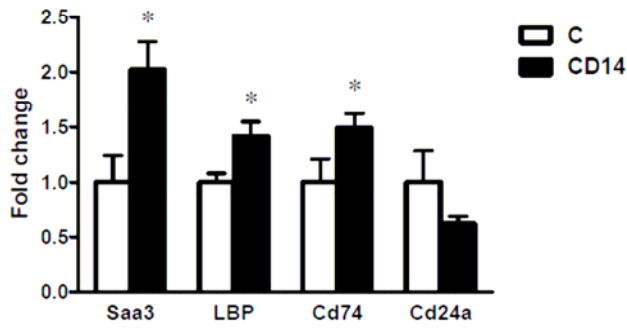

B

Lipid related genes

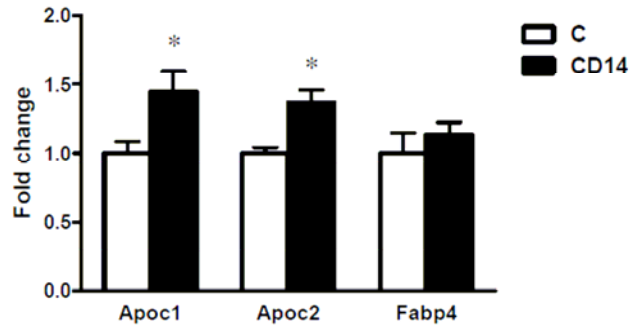

C

Proinflammatory cytokines

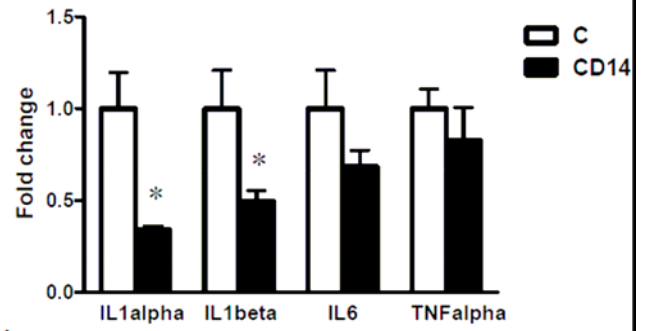

## SUPPLEMENTARY DATA

**Supplementary Figures 4 and 5.** Expression profiles of genes listed in Supplementary Table 1 were analyzed using The Ingenuity Pathway Analysis (IPA) methodology to compose a set of interactive networks, taking into consideration canonical pathways and the relevant biological interactions. Focus genes were defined as those with an absolute mean fold-change of at least 1.5. A number of canonical pathways came up as playing an important role, especially those related with Glycolysis and Gluconeogenesis and IL-4 signaling. Next, two significant biological networks were identified by IPA. Further analysis of the highest scored network (score 24, 14 focus genes) identified inflammatory response ( $p < 0.028$ ), Genetic Disorder ( $p < 0.048$ ) and Inflammatory Disease ( $p < 0.0375$ ) as the most significant biological functions linked to these networks.

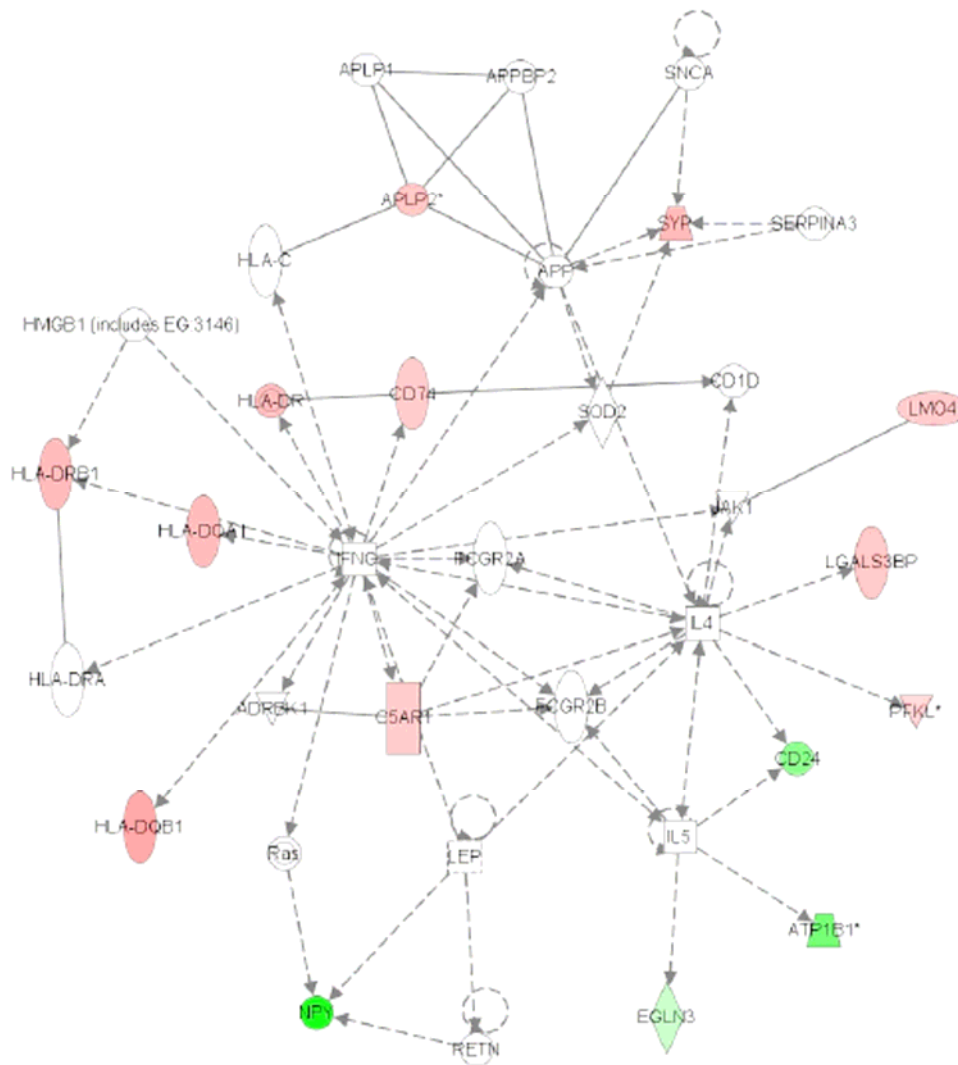

SUPPLEMENTARY DATA

Network 2: str05SampleMth-MOUSE-DS - 2010-05-02 10:51 PM str05SampleMth-MOUSE-DS str05SampleMth-MOUSE-DS - 2010-05-02 PM

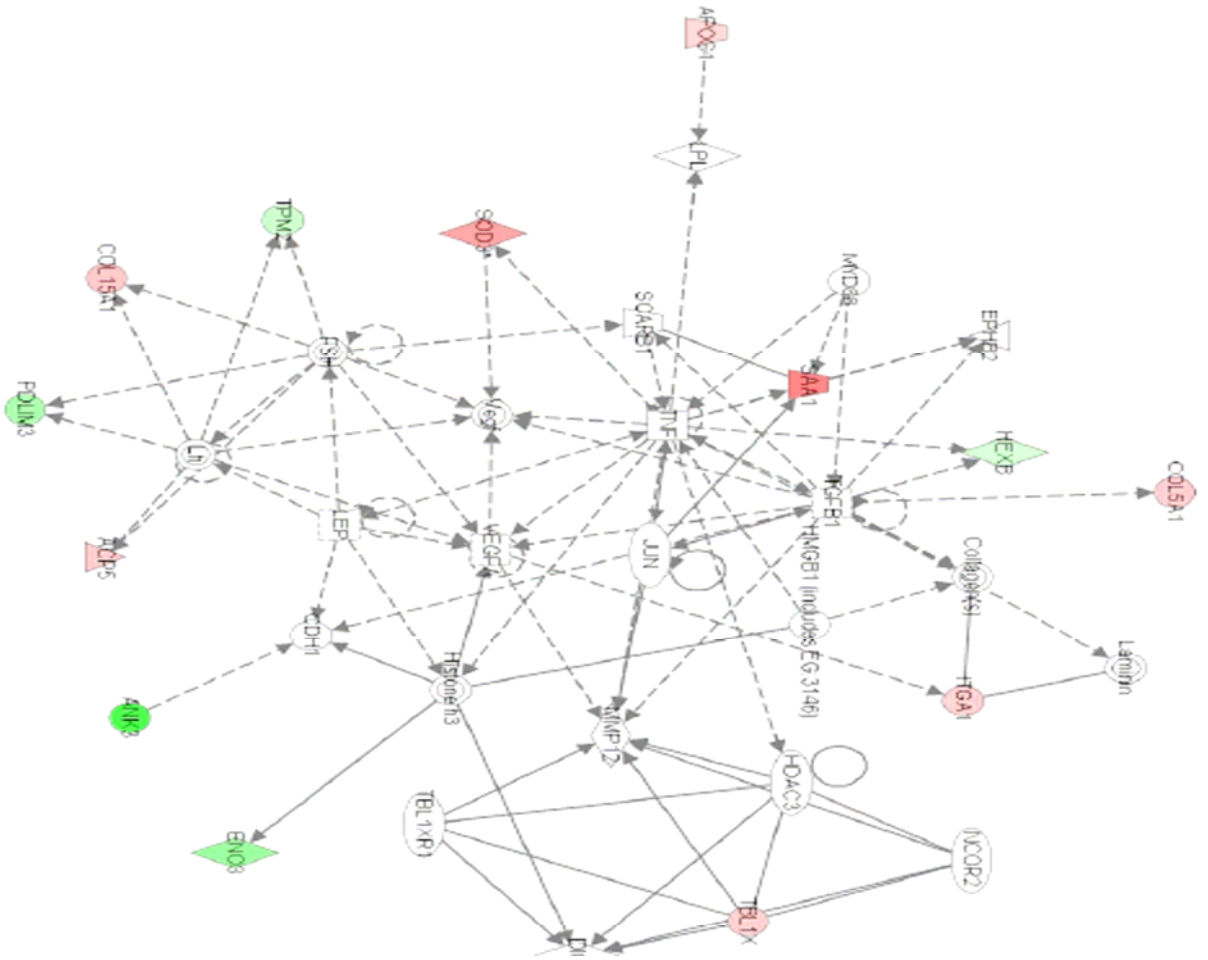

© 2009-2010 Inpurity Systems, Inc. All rights reserved.
